# Supplementary material for: Lipid bilayer stress-activated IRE-1 modulates autophagy during endoplasmic reticulum stress
Source: Oxford University Press journal article supplement (doi:10.1242/jcs.217992), 2018-10-17
Supplement: jcs217992supp.pdf [file jcs217992supp.pdf]

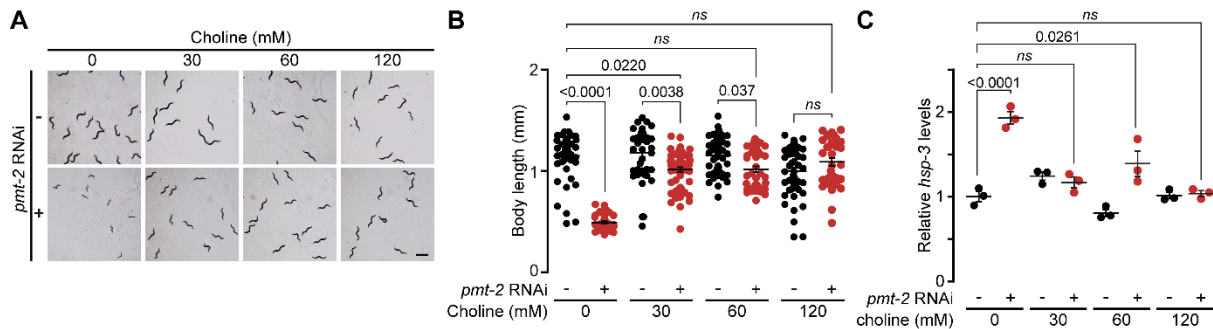

**Figure S1**, Refers to **Figure 1**. **Choline supplementation restores developmental defects in *pmt-2(RNAi)* animals.**

(A) Representative choline rescue assay of *pmt-2(RNAi)* developmental defect. L1 worms were grown on *pmt-2 RNAi* or empty vector on plates supplemented with 0, 30, 60, or 120 mM choline, and images were taken after 48 h. Scale bar, 100  $\mu$ m. (B) Body length quantification of worms from **A**. WT, 0 mM choline, n=47(-), n=32(+); 30 mM choline, n=39(-), n=58(+); 60 mM choline, n=48(-), n=43(+); 120 mM choline, n=54(-), n=38(+). (C) qPCR of *hsp-3* expression level in WT worms treated as in **A**. Data shown is the mean  $\pm$  s.e.m. of at least three independent experiments. Statistical analysis was subjected to one-way ANOVA followed by Tukey's multiple comparisons adjustment. ns, non-significant.

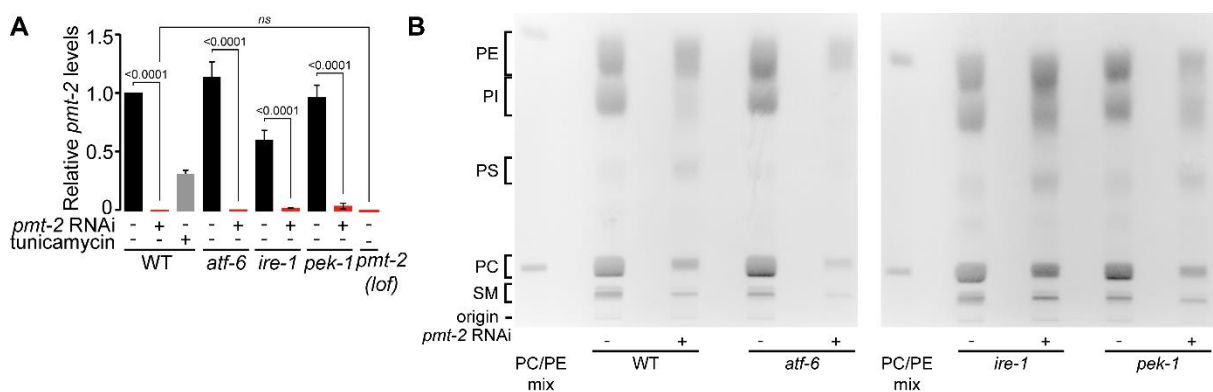

**Figure S2**, Refers to **Figure 2A-B**. **Inactivation of *pmt-2* decreased PC content in worms.**

(A) qPCR of *pmt-2* expression after *pmt-2 RNAi* treatment in WT, *atf-6(lof)*, *ire-1(lof)*, and *pek-1(lof)* worms. *pmt-2(lof)* worms were used as a control. *pmt-2 RNAi* treatment efficiently silenced expression of *pmt-2* across all the strains tested. (B) Representative separation of PE, MMPE, DMPE, and PC from total lipid extract using thin-layer chromatography (TLC). Comparison of phospholipid levels in WT, *atf-6(lof)*, *ire-1(lof)* and *pek-1(lof)* animals treated with *pmt-2 RNAi*. POPE (1-palmitoyl-2-oleoyl-sn-glycero-3-phosphoethanolamine; 16:0-18:1n9 PE) and DOPC (1,2-dioleoyl-sn-glycero-3-phosphocholine; 18:1n9 PC) were used as markers. Data shown is the mean  $\pm$  s.e.m. of at least three independent experiments. Statistical analysis was subjected to one-way ANOVA followed by Tukey's multiple comparisons adjustment. ns, non-significant.

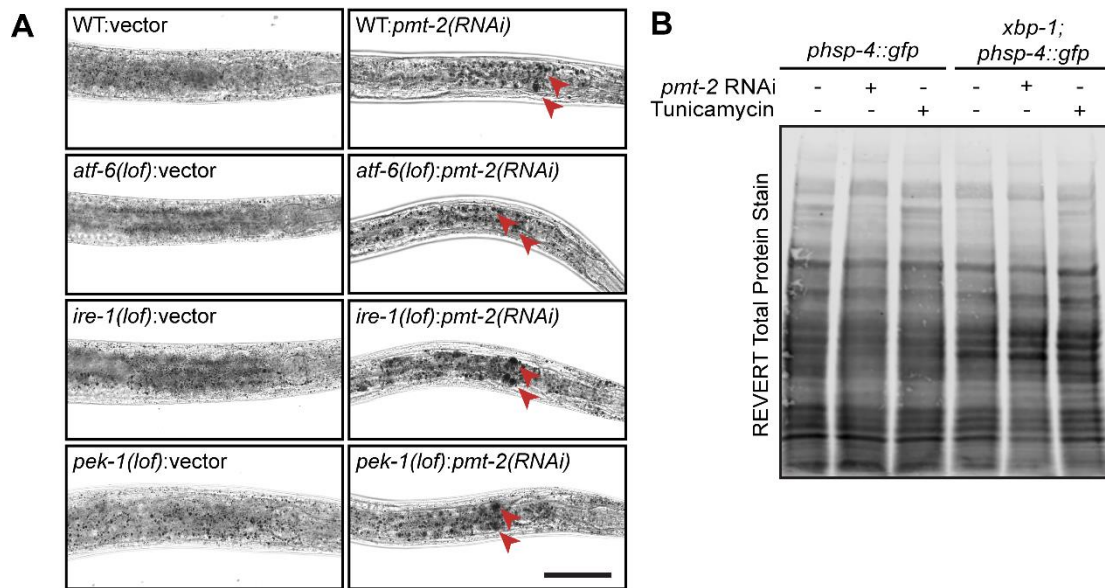

**Figure S3, Refers to Figure 2C,F. Lipid perturbation induces lipid droplets accumulation and activates the UPR.**

(A) Representative images of lipid droplet visualised using Sudan Black B staining of WT, *atf-6*(*lof*), *ire-1*(*lof*) and *pek-1*(*lof*) animals treated with *pmt-2* RNAi. Brightfield images of stained worms are shown using 63X objective lens. Red arrowhead highlights large LDs. Scale bar, 100  $\mu$ m. (B) Total protein stain verified equal loading and served as normalization control for the immunoblot.

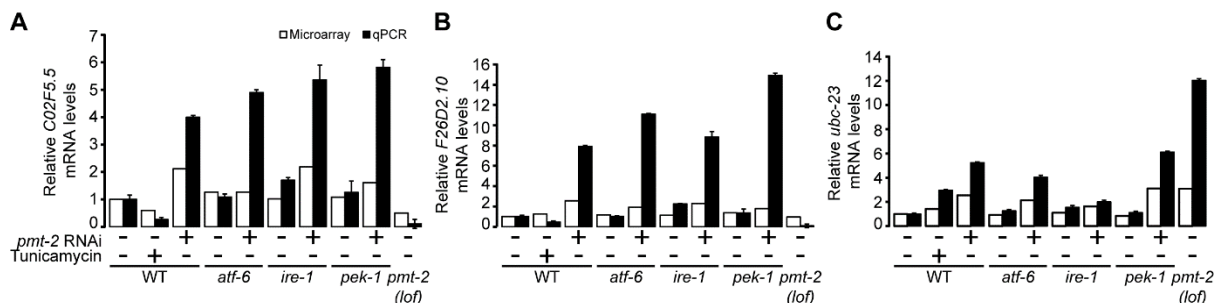

**Figure S4, Refers to Figure 3. Validation of DNA microarray analysis using quantitative real-time PCR.**

(A-C) Comparison of *C02F5.5* (A), *F26D2.10* (B), and *ubc-23* (C) gene expression in WT, *atf-6*(*lof*), *ire-1*(*lof*) and *pek-1*(*lof*) animals treated with *pmt-2* RNAi by DNA microarray (white bars) and qPCR (black bars). *C02F5.5* and *F26D2.10*, are both uncharacterized genes; *ubc-23*, a member of the BCL-2 family. The figure represents technical triplicates.

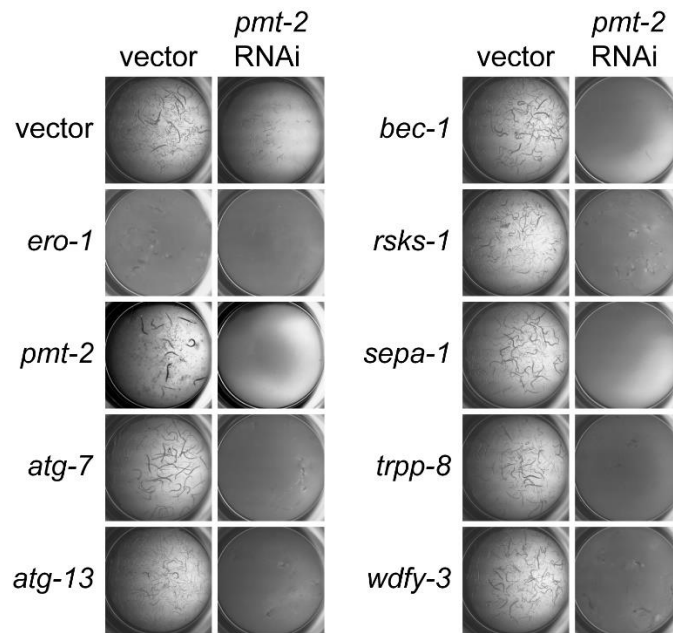

**Figure S5, Refers to Figure 5. Autophagy is essential during lipid perturbation.** WT worms were treated with vector or *pmt-2* RNAi for 36 h and subsequently subjected to RNAi in liquid media in a 96-well plate for 5 days. The worms were scored based on their developmental defects as described in Fig. 5A. *ero-1* RNAi was included as a positive control.

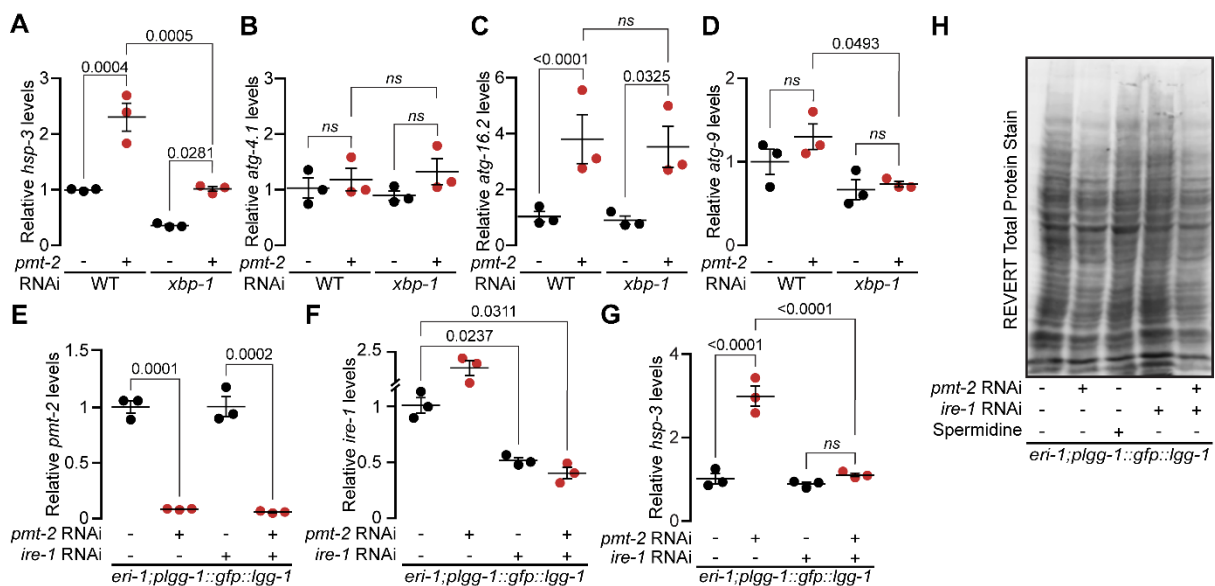

**Figure S6, Refers to Figure 5. Autophagy is partially dependent on XBP-1.** qPCR comparing expression of *hsp-3* (A), *atg-4.1* (B), *atg-16.2* (C), *atg-9* (D) in WT and *xbp-1*(*lof*) mutants treated with *pmt-2* RNAi. qPCR comparing expression of *pmt-2* (E), *ire-1* (F), *hsp-3* (G) in *eri-1;plgg-1::gfp::lgg-1* worms treated with *pmt-2*, *ire-1*, and *ire-1;pmt-2* RNAis; technical triplicates. (H) Total protein stain verified equal loading and served as normalization control for the immunoblot. Data shown is the mean  $\pm$  s.e.m. of at least three independent experiments. Statistical analysis was subjected to one-way ANOVA followed by Tukey's multiple comparisons adjustment. ns, non-significant.

Table S1. Oligonucleotide primers used in the study.

| Gene            | Sequence (5' to 3')                                | Assay |
|-----------------|----------------------------------------------------|-------|
| <i>act-1</i>    | AGGACTGGGTGCTCTTCTGG<br>GAGCACGGTATCGTCACCAA       | qPCR  |
| <i>atg-4.1</i>  | AGGAAGATGGAATCGAGGCAA<br>TGCAACCCCATCCTTGATCC      | qPCR  |
| <i>atg-9</i>    | ATGGAATCGTTCTTCTCACTG<br>GCAGGAGGTATTGTATCTTCTC    | qPCR  |
| <i>atg-16.2</i> | ATGTGCTGGCTGGATCTTCG<br>GAGCCGAATCTGATCTCGCAG      | qPCR  |
| <i>atg-18</i>   | CCGAAGTCAGACACTAGTCGAG<br>TCGGAACCGATTGGTTGCTTG    | qPCR  |
| <i>bec-1</i>    | AAGCTCTGACTGGACATTCTCG<br>GCGTCAGAGCAATCATTACAAAC  | qPCR  |
| <i>atg-18</i>   | CCGAAGTCAGACACTAGTCGAG<br>TCGGAACCGATTGGTTGCTTG    | qPCR  |
| <i>C02F5.5</i>  | CATCTTTTGAGCTTATGATGGTGCT<br>AAGCACCAAGGAACACGAGAT | qPCR  |
| <i>epg-4</i>    | CCAATTCCTCTTATCACACCA<br>GTCGAAGAAGTAATCGAAACAG    | qPCR  |
| <i>F26D2.10</i> | CTCTTGTGGCAGCTCATGGT<br>CGTGGATCAAAAACAGCGGC       | qPCR  |
| <i>hsp-3</i>    | AGAAGGAGACCAAGTATGGAACC<br>TGATACGGTTTCCTTGGTCGTT  | qPCR  |
| <i>hsp-4</i>    | CATCTCGTGGAATCAACCCT<br>TGACGTCAAGAAGGACAACA       | qPCR  |
| <i>lgg-1</i>    | TCGTGATGGTCCTGGTAGAGT<br>ACGCATCCAACCTTCGTCCA      | qPCR  |
| <i>ire-1</i>    | ACAATGGCTAGTCAGCGAGG<br>CAATCCAGCCATCGGTTCTT       | qPCR  |
| <i>pmt-2</i>    | AGAACGTGGTCATTTGGAGCAG<br>TTCGCGTTGGGTAAACTTCGAC   | qPCR  |

**Table S2**, Refers to **Figure 3A**. List of upregulated and downregulated genes in *pmt-2(RNAi)* and WT treated with tunicamycin compared to WT animals. Excel Spreadsheet

[Click here to Download Table S2](#)

**Table S3**, Refers to **Figure 3B. List of upregulated genes from the four-way Venn diagram.** Excel Spreadsheet

[Click here to Download Table S3](#)

**Table S4**, Refers to **Figure 3C. Hierarchical clustering gene list.** Excel Spreadsheet

[Click here to Download Table S4](#)

**Table S5**, Refers to **Figure 4. Predominant GO terms of each cluster.** Excel Spreadsheet

[Click here to Download Table S5](#)

**Table S6**, Refers to **Figure 5. Phenotype from RNAi screen of autophagy genes.** Excel Spreadsheet

[Click here to Download Table S6](#)
